# Supplementary material for: Parotid-sparing intensity modulated versus conventional radiotherapy in head and neck cancer (PARSPORT): a phase 3 multicentre randomised controlled trial
Source: PubMed Central journal article supplement (PMC3033533; doi:10.1016/s1470-2045(10)70290-4), 2011-02
Supplement: mmc1.pdf [file mmc1.pdf]

# THE LANCET Oncology

## Supplementary webappendix

This webappendix formed part of the original submission and has been peer reviewed. We post it as supplied by the authors.

Supplement to: Nutting CM, Morden JP, Harrington KJ, et al. Parotid-sparing intensity modulated versus conventional radiotherapy in head and neck cancer (PARSPORT): a phase 3 multicentre randomised controlled trial. *Lancet Oncol* 2011; published online Jan 13. DOI:10.1016/S1470-2045(10)70290-4.

**Web Appendix – “Results of a Phase III Multi-Center Randomized Controlled Trial of Parotid-Sparing Intensity Modulated versus Conventional Radiotherapy in Head and Neck Cancer”**

**Table A: Mean changes from baseline, and differences between treatment groups in Modified Xerostomia questionnaire items**

| XQ item                              | CRT |                                  |        |       | IMRT |                                  |        |       | Difference between arms (CRT - IMRT) | 99% CI |       |
|--------------------------------------|-----|----------------------------------|--------|-------|------|----------------------------------|--------|-------|--------------------------------------|--------|-------|
|                                      | n   | Mean deterioration from baseline | 99% CI |       | n    | Mean deterioration from baseline | 99% CI |       |                                      | Lower  | Upper |
|                                      |     |                                  | Lower  | Upper |      |                                  | Lower  | Upper |                                      |        |       |
| <b>Baseline to 12 months</b>         |     |                                  |        |       |      |                                  |        |       |                                      |        |       |
| 1) Difficulty speaking               | 17  | 3.6                              | 1.8    | 5.5   | 22   | 2                                | 0.1    | 3.9   | 1.6                                  | -0.9   | 4.2   |
| 2) Difficulty chewing                | 17  | 5.6                              | 3.5    | 7.7   | 21   | 4.1                              | 2      | 6.2   | 1.5                                  | -1.4   | 4.4   |
| 3) Difficulty swallowing             | 17  | 5.3                              | 3.1    | 7.5   | 21   | 4.2                              | 2      | 6.5   | 1.1                                  | -2     | 4.1   |
| 4) Dryness when eating               | 17  | 5.3                              | 3.2    | 7.4   | 21   | 4.1                              | 2      | 6.2   | 1.2                                  | -1.7   | 4     |
| 5) Dryness when not eating           | 17  | 4.3                              | 2.3    | 6.3   | 22   | 3.2                              | 1.4    | 5     | 1.1                                  | -1.4   | 3.7   |
| 6) Sipping liquids to aid swallowing | 17  | 5.4                              | 2.9    | 7.9   | 21   | 4.4                              | 1.7    | 7.1   | 1                                    | -2.5   | 4.6   |
| 7) Sipping liquids when not eating   | 17  | 4                                | 1.4    | 6.6   | 22   | 2.9                              | 0.9    | 4.9   | 1.1                                  | -2     | 4.1   |
| 8) Sleeping problems due to dryness  | 17  | 3.2                              | 0.5    | 5.8   | 22   | 2.2                              | 0.2    | 4.2   | 1                                    | -2.1   | 4.1   |
| <b>Baseline to 24 months</b>         |     |                                  |        |       |      |                                  |        |       |                                      |        |       |
| 1) Difficulty speaking               | 13  | 3.9                              | 1.6    | 6.3   | 20   | 1.9                              | -0.4   | 4.1   | 2.1                                  | -1.1   | 5.2   |
| 2) Difficulty chewing                | 13  | 5.7                              | 2.9    | 8.5   | 20   | 3.7                              | 1      | 6.3   | 2                                    | -1.7   | 5.8   |
| 3) Difficulty swallowing             | 13  | 5.5                              | 2.7    | 8.4   | 20   | 4.2                              | 1.7    | 6.7   | 1.3                                  | -2.3   | 4.9   |
| 4) Dryness when eating               | 13  | 5.3                              | 2.4    | 8.2   | 20   | 4.1                              | 1.7    | 6.4   | 1.3                                  | -2.3   | 4.8   |
| 5) Dryness when not eating           | 13  | 4.2                              | 1.3    | 7     | 20   | 3                                | 0.9    | 5     | 1.2                                  | -2     | 4.5   |
| 6) Sipping liquids to aid swallowing | 12  | 6                                | 3.2    | 8.8   | 20   | 4                                | 1.2    | 6.8   | 2                                    | -1.9   | 5.9   |
| 7) Sipping liquids when not eating   | 13  | 4.1                              | 1.3    | 6.9   | 20   | 1.9                              | 0      | 3.7   | 2.2                                  | -0.7   | 5.2   |
| 8) Sleeping problems due to dryness  | 13  | 2.1                              | -0.8   | 5     | 20   | 1.4                              | -0.8   | 3.6   | 0.7                                  | -2.7   | 4.1   |

## PARSPORT Trialists

*Participating Centres:* We thank the patients and all the investigators and research support staff at the participating centers.

Principal and main co-investigators according to center (number of patients recruited) were:

Royal Marsden Hospital NHS Foundation Trust, Sutton (28) and London (45) – C Nutting, K Harrington, K Newbold, S Bhide, T Guerrero Urbano; Ipswich Hospital (6) – C Scrase; Christie Hospital Manchester (7) – B Yap, N Slevin, A Sykes; Addenbrookes Hospital NHS Foundation Trust (2) – S Jefferies, R Benson; University Hospital of North Staffordshire (6) – F Adab.

*Trial Management Group:* In addition to the authors the following are members of the Trial Management Group; D Carnell (University College Hospital, London), C Coyle (St James University Hospital, Leeds), C Mackenzie (Ipswich Hospital), G Robertson, M Robinson (Weston Park Hospital, Sheffield), A Sibtain (St Bartholomews Hospital, London), N Slevin (Christie Hospital, Manchester), J Swinscoe (Weston Park Hospital, Sheffield), A Sykes (Christie Hospital, Manchester) and G Webster (Christie Hospital, Manchester).

*Trial Steering Committee:* S Bentzen (Chair, University Of Wisconsin Medical School, Madison, USA), S Rogers (University of Liverpool), V Gregoire (,Belgium) and M Henk (Royal Marden Hospital NHS Foundation Trust, Sutton, retired).

*Independent Data Monitoring Committee:* P Hoskin (Chair, Mount Vernon Hospital, Middlesex), M Saunders (University College Hospital London, retired) and W Qian (MRC Clinical Trials Unit, London)

*ICR-CTSU:* In addition to the authors the following were also members of ICR-CTSU and contributed to co-ordination and analysis of the trial, S Ghuman, L Lloyd, S Patel, C Peckitt and MS Rogers.
